# Supplementary material for: A Comparative Study on the Self-Healing Characterizations and Formulation Optimization of Polyurea Coating
Source: MDPI journal article supplement (doi:10.3390/polym14173520), 2022-08-27
Supplement: s1 [file s1]

**Table S1.** Names, functions and purpose of materials.

| Chemical name     | Full name                                        | Function                                     | Purpose                                                                                                            |
|-------------------|--------------------------------------------------|----------------------------------------------|--------------------------------------------------------------------------------------------------------------------|
| D2000             | Poly(propylene glycol) bis (2-aminopropyl ether) | Long chain diamine (soft segment)            |                                                                                                                    |
| P1000             | Polytetramethyleneoxide-di-p-aminobenzoate       | Long chain diamine (soft segment)            |                                                                                                                    |
| IPDI              | Isophorone diisocyanate                          | Aliphatic diisocyanate (hard segment)        | IPDI known good self-healing performance but bad mechanical property                                               |
| MDI               | 4,4-methylenebis(phenyl isocyanate)              | Aromatic diisocyanate (hard segment)         | MDI known for poor self-healing performance but good mechanical property                                           |
| TDI               | Toulene 2,4 diisocyanate                         | Aromatic diisocyanate                        | Average self-healing performance and average mechanical property                                                   |
| PPD               | p-phenylenediamine                               | Amine chain extender without disulfide bonds |                                                                                                                    |
| DDS               | Bis(4-aminophenyl) Sulfone                       | Amine chain extender without disulfide bonds | DDS has bulkier structure than PPD                                                                                 |
| DTDA              | 4,4'-dithiodianiline                             | Amine chain extender with disulfide bonds    | Comparison between different chain extenders.<br>DTDA has similar structure as DDS.<br>PPD has lower Mw than DTDA. |
| THF               | Tetrahydrofuran                                  | Solvent                                      |                                                                                                                    |
| CHCl <sub>3</sub> | Chloroform                                       | Solvent                                      |                                                                                                                    |

**Table S2.** Initial plan to fabricate polyurea samples.

| Sample number | Sample name                                      | Mole of D2000 (mmol) | Mole ratio of IPDI: MDI | Mole of diisocyanate (mmol) | Mole of PPD/DDS/DTDA | Mole ratio of D2000: diisocyanate: chain extender |
|---------------|--------------------------------------------------|----------------------|-------------------------|-----------------------------|----------------------|---------------------------------------------------|
| 1             | D2000-IPDI-PPD                                   | 0.5                  | 1:0                     | 1.0                         | 0.5                  | 1:2:1                                             |
| 2             | D2000-IPDI <sub>1</sub> – MDI <sub>1</sub> – PPD | 0.5                  | 1:1                     | 1.0                         | 0.5                  | 1:2:1                                             |
| 3             | D2000-IPDI <sub>2</sub> – MDI <sub>1</sub> – PPD | 0.5                  | 2:1                     | 1.0                         | 0.5                  | 1:2:1                                             |
| 4             | D2000-IPDI <sub>3</sub> – MDI <sub>1</sub> –PPD  | 0.5                  | 3:1                     | 1.0                         | 0.5                  | 1:2:1                                             |
| 5             | D2000-MDI-PPD                                    | 0.5                  | 0:1                     | 1.0                         | 0.5                  | 1:2:1                                             |
| 6             | (Best of 1-5)-DDS                                | 0.5                  | -                       | 1.0                         | 0.5                  | 1:2:1                                             |
| 7             | (Best of 1-5)-DTDA                               | 0.5                  | -                       | 1.0                         | 0.5                  | 1:2:1                                             |

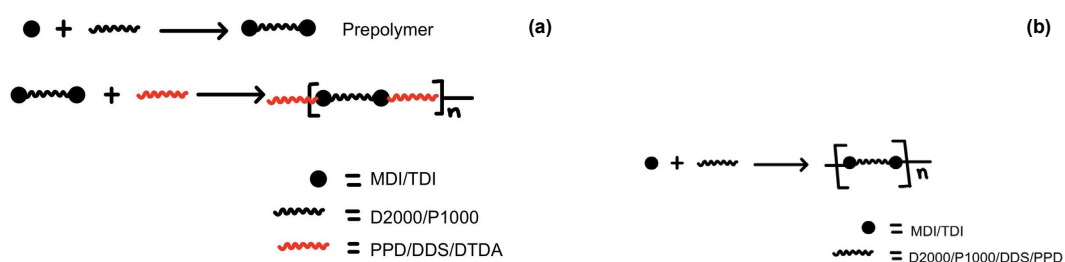**Figure S1.** Reaction to (a) fabricate polyurea according to initial plan and (b) reaction of diisocyanate with amine.

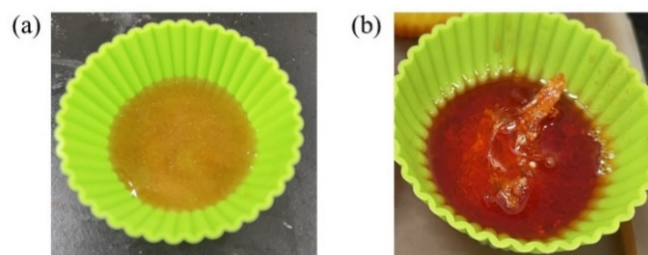

**Figure S2.** (a) Liquid mixture, and (b) After heating in oven, solid formed and liquid mixture turned red.

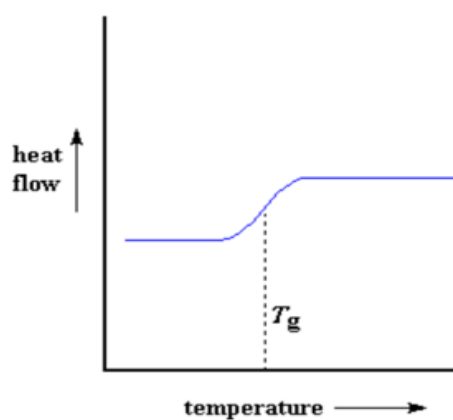

**Figure S3.** Glass transition temperature portrayed on DSC graph.

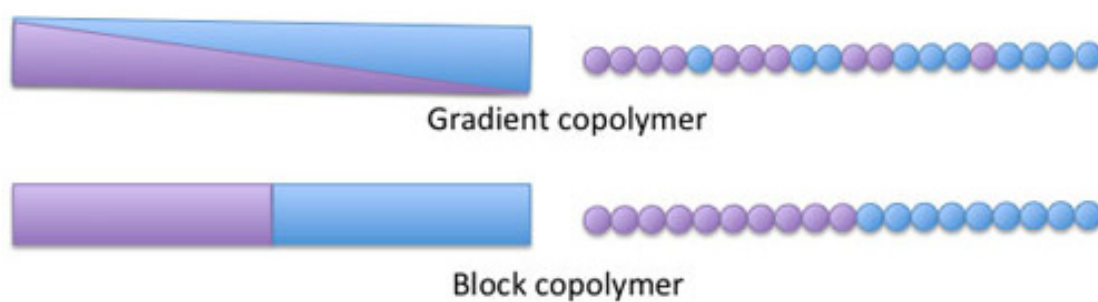

**Figure S4.** Gradient copolymer vs block copolymer.
